# Supplementary material
Source: publisher site journal article supplement (https://www.dovepress.com/article/364069)
Supplement: Supplementary file 1 [file get_supplementary_file.php]

**Supplementary figure and table**

**Supplementary Figure 1.** UCG was analyzed by LC-MS in (A). negative and (B). positive ions modes.


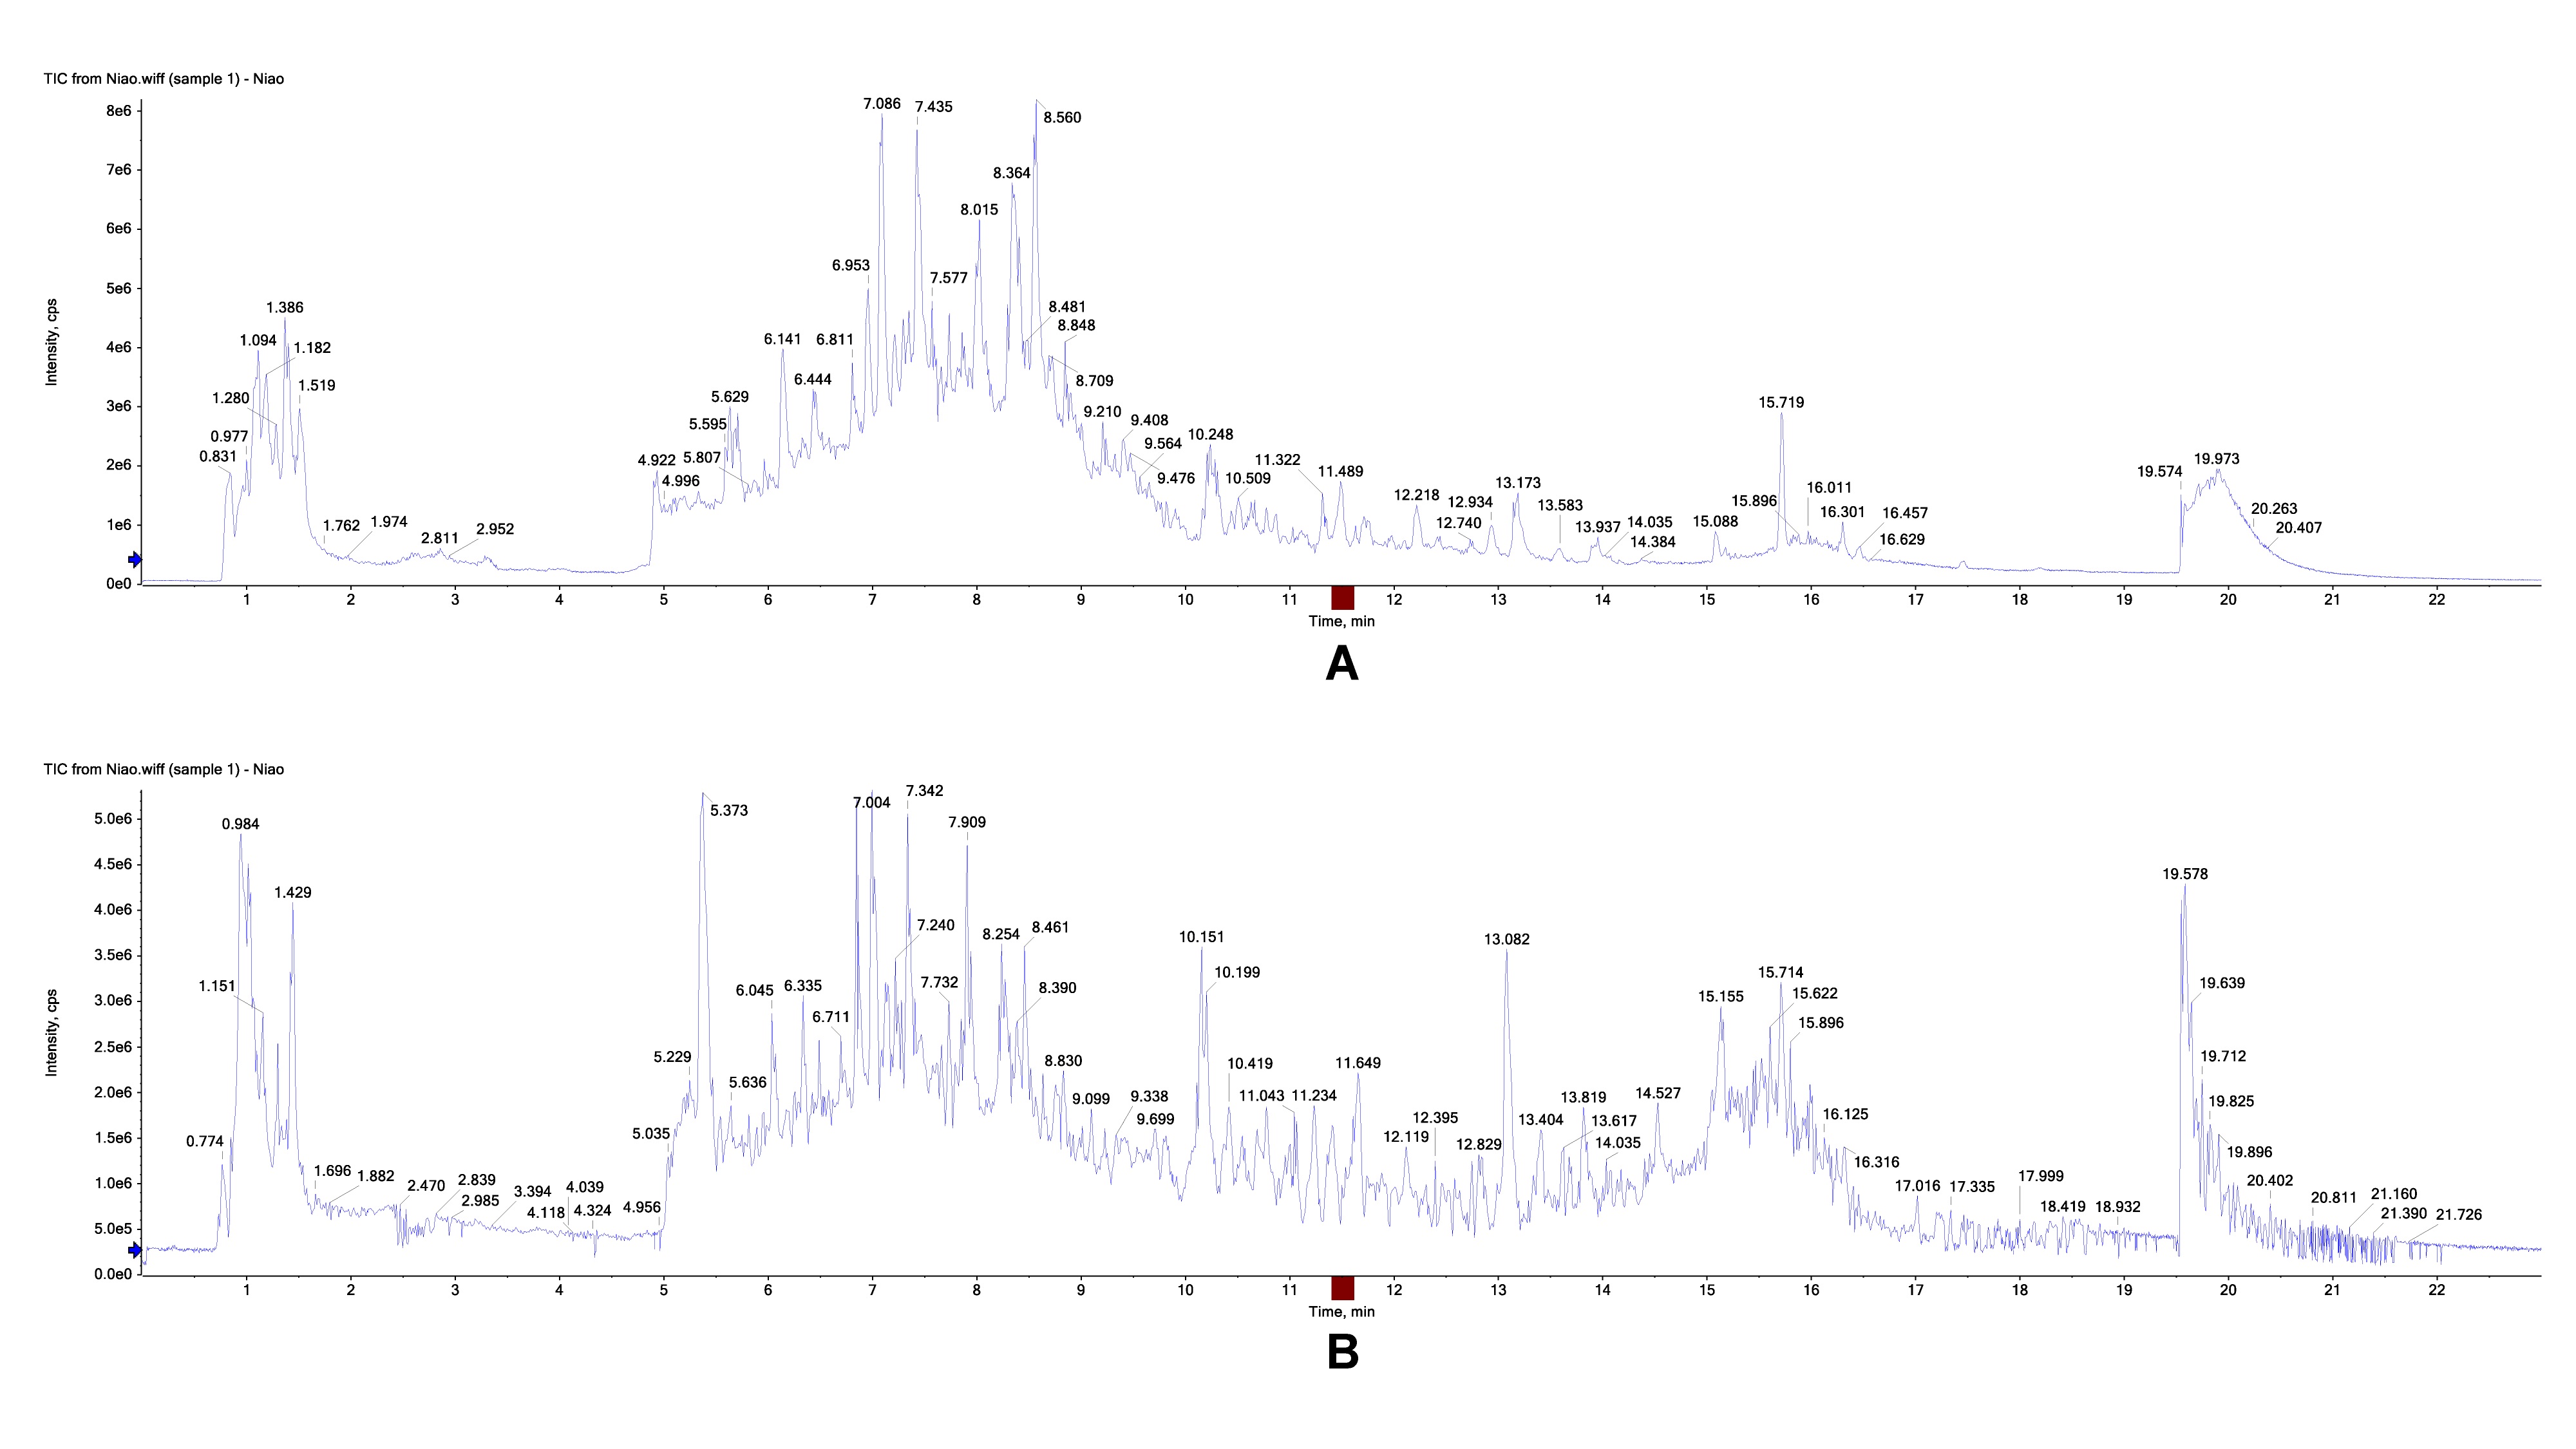


**Supplementary Table 1.** Information of each component in UCG detected by LC-MS.

| Component Name | Retention Time | Area | Adduct / Charge | Precursor Mass | Found At Mass |
| --- | --- | --- | --- | --- | --- |
| Glycyrrhizic acid ammonium salt | 10.17 | 2.31E+06 | [M+H]+ | 823.411 | 823.4118 |
| Albiflorin | 6.86 | 1.75E+06 | [M+H]+ | 481.17 | 481.1708 |
| Sophoridine | 5.38 | 1.67E+06 | [M+H]+ | 249.197 | 249.1968 |
| Paeoniflorin +NH3 | 7 | 1.52E+06 | [M+NH4]+ | 498.196 | 498.1963 |
| Albiflorin | 7.91 | 1.08E+06 | [M+H]+ | 481.17 | 481.1702 |
| Glycitin | 8.81 | 1.07E+06 | [M+H]+ | 447.129 | 447.1291 |
| Diphenoxylate | 10.17 | 8.61E+05 | [M+H]+ | 453.336 | 453.3367 |
| 2,3,5,4'-Tetrahydroxystilbene-2-O-b-D-glucoside | 7.35 | 8.49E+05 | [M+H]+ | 407.134 | 407.1336 |
| Enoximone | 5.37 | 7.77E+05 | [2M+H]+ | 497.386 | 497.3856 |
| Ononin | 8.24 | 6.58E+05 | [M+H]+ | 431.134 | 431.1336 |
| calycosin-7-o-glucoside | 7.23 | 6.08E+05 | [M+H]+ | 447.129 | 447.1291 |
| Glycyrrhizic acid ammonium salt | 10.17 | 5.24E+05 | [M+NH4]+ | 840.437 | 840.4372 |
| Genistin | 7.74 | 5.09E+05 | [M+H]+ | 433.113 | 433.1127 |
| Astragalin | 7.34 | 4.85E+05 | [M+H]+ | 449.108 | 449.1078 |
| Rutin | 7.13 | 4.80E+05 | [M+H]+ | 611.161 | 611.1612 |
| Pratensein-7-O-glucoside | 7.9 | 4.54E+05 | [M+H]+ | 463.123 | 463.1233 |
| 2,3,5,4'-Tetrahydroxystilbene-2-O-b-D-glucoside | 6.06 | 4.53E+05 | [M+H]+ | 407.134 | 407.1339 |
| Tuberostemonine | 11.66 | 4.22E+05 | [M+H]+ | 376.26 | 376.26 |
| Mulberroside A | 6.05 | 4.17E+05 | [M+H]+ | 569.186 | 569.1863 |
| Sophocarpine | 5.44 | 4.10E+05 | [M+H]+ | 247.181 | 247.1813 |
| OXOPROLINE | 1.56 | 3.94E+05 | [M+H]+ | 130.05 | 130.0496 |
| URSODEOXYCHOLATE | 11.66 | 3.73E+05 | [M+NH4]+ | 393.286 | 393.2864 |
| 5-HYDROXYLYSINE | 11.84 | 3.52E+05 | [M+H]+ | 163.133 | 163.1331 |
| linarin | 8.42 | 3.51E+05 | [M+H]+ | 593.186 | 593.1864 |
| Benzoylpaeoniflorin +NH3 | 9.12 | 3.22E+05 | [M+NH4]+ | 602.223 | 602.2225 |
| ERUCATE | 18.2 | 3.06E+05 | [M]+ | 338.342 | 338.3424 |
| Luteolin-7-O-β-D-glucuronide | 7.38 | 2.96E+05 | [M+H]+ | 463.087 | 463.0869 |
| Albiflorin | 7.91 | 2.81E+05 | [M+NH4]+ | 498.197 | 498.1964 |
| Maltotriose | 1.11 | 2.75E+05 | [M+NH4]+ | 522.203 | 522.203 |
| ADENOSINE-MONOPHOSPHATE | 9.72 | 2.65E+05 | [M+H]+ | 348.275 | 348.2749 |
| Piceatannol | 7.35 | 2.53E+05 | [M+H]+ | 245.081 | 245.081 |
| Chlorogenic Acid | 6.34 | 2.47E+05 | [M+H]+ | 355.103 | 355.1024 |
| 5-HYDROXYLYSINE | 10.93 | 2.38E+05 | [M+H]+ | 163.133 | 163.1331 |
| Wilforlide A | 10.43 | 2.37E+05 | [M+H]+ | 455.352 | 455.3522 |
| Proline | 1.16 | 2.33E+05 | [M+H]+ | 116.07 | 116.0704 |
| Alpha-Lactose | 1.31 | 2.30E+05 | [M+NH4]+ | 360.15 | 360.1501 |
| Wilforlide A | 11.25 | 2.20E+05 | [M+H]+ | 455.352 | 455.352 |
| Isochlorogenic acid A | 7.79 | 2.19E+05 | [M]+ | 517.134 | 517.1342 |
| Glycyrrhetinic acid | 10.17 | 2.14E+05 | [M+H]+ | 471.347 | 471.3463 |
| Isochlorogenic acid A | 6.73 | 2.11E+05 | [M+H]+ | 517.134 | 517.1339 |
| Flucythrinate | 9.35 | 2.02E+05 | [M+H]+ | 469.331 | 469.331 |
| Schaftoside | 6.74 | 2.01E+05 | [M+H]+ | 565.155 | 565.155 |
| TYROSINE | 2.18 | 2.00E+05 | [M+NH4]+ | 182.081 | 182.0812 |
| Mulberroside A | 6.05 | 1.89E+05 | [M+NH4]+ | 586.213 | 586.2125 |
| CYTIDINE DIPHOSPHATE | 11.06 | 1.89E+05 | [M+NH4]+ | 404.207 | 404.2071 |
| ARGININE | 0.93 | 1.88E+05 | [M+H]+ | 175.119 | 175.119 |
| Oxymatrine | 5.22 | 1.84E+05 | [M+H]+ | 265.192 | 265.1916 |
| ISOLEUCINE | 2.23 | 1.84E+05 | [M+CH3OH+H]+ | 132.102 | 132.1018 |
| 1,2-Dichloroethane | 9.57 | 1.83E+05 | [M+H]+ | 100.075 | 100.0755 |
| Esculetin | 7 | 1.82E+05 | [M+H]+ | 179.071 | 179.0704 |
| N-Acetyl-L-tryptophan | 6.34 | 1.68E+05 | [M+H]+ | 247.145 | 247.1445 |
| Raffinose | 1.39 | 1.68E+05 | [M]+ | 505.176 | 505.1769 |
| Liquiritin | 8.16 | 1.67E+05 | [M+K]+ | 419.134 | 419.134 |
| Oxyresveratrol | 6.06 | 1.61E+05 | [M+H]+ | 245.081 | 245.0812 |
| Ropinirol | 3.16 | 1.57E+05 | [M+H]+ | 261.16 | 261.1599 |
| Fonofos | 5.45 | 1.57E+05 | [2M+H]+ | 493.355 | 493.3549 |
| Citric acid | 2.39 | 1.56E+05 | [M+NH4]+ | 210.061 | 210.0611 |
| Cryptotanshinone | 13.41 | 1.52E+05 | [M+H]+ | 297.149 | 297.149 |
| 4-Methylpyrazole- | 19.62 | 1.51E+05 | [M+H]+ | 82.996 | 82.9966 |
| 13-cis-Retinoic acid | 7 | 1.47E+05 | [M+H]+ | 301.108 | 301.1073 |
| 5-HYDROXYLYSINE | 13.34 | 1.40E+05 | [M+H]+ | 163.133 | 163.1332 |
| N-TAmP-FHxSA (N-trimethylammoniopropyl perfluorohexanesulfonamide) (pos) | 1.02 | 1.39E+05 | [M+H]+ | 499.224 | 499.2242 |
| A 3-N-butyl-4,5-dihydrophthalide | 11.61 | 1.38E+05 | [M+H]+ | 193.123 | 193.1228 |
| 6-Beta-Naltrexol | 2.21 | 1.38E+05 | [M+H]+ | 344.134 | 344.1341 |
| Apigenin | 9.47 | 1.35E+05 | [M]+ | 271.061 | 271.0607 |
| Cichoric acid +Na | 15.14 | 1.26E+05 | [M+H]+ | 497.388 | 497.3878 |
| Methyllinoleate | 9.72 | 1.26E+05 | [M]+ | 295.227 | 295.2271 |
| Cantharidin | 6.86 | 1.25E+05 | [M+H]+ | 197.081 | 197.0808 |
| BENZOATE | 19.62 | 1.24E+05 | [M+H]+ | 122.964 | 122.9638 |
| Citric acid | 2.39 | 1.21E+05 | [M+H]+ | 193.035 | 193.0345 |
| CARBAMOYL PHOSPHATE | 20.62 | 1.17E+05 | [M+H]+ | 141.958 | 141.9586 |
| m-Xylene | 9.56 | 1.13E+05 | [M+H]+ | 107.07 | 107.0701 |
| Dihydrotanshinone I | 12.39 | 1.12E+05 | [M+H]+ | 279.102 | 279.1019 |
| Suberic acid | 1.82 | 1.11E+05 | [M+H]+ | 175.024 | 175.0234 |
| Isoalantolactone | 12.75 | 1.07E+05 | [M+H]+ | 233.154 | 233.1542 |
| Alpha-Lactose | 1.31 | 1.05E+05 | [M+H]+ | 343.123 | 343.1237 |
| Liquiritin | 7.23 | 1.05E+05 | [M+H]+ | 419.133 | 419.1331 |
| Albiflorin | 7.91 | 1.04E+05 | [2M+NH4]+ | 978.36 | 978.36 |
| Glycerophosphocholine | 1.03 | 1.04E+05 | [M+H]+ | 258.11 | 258.11 |
| Epicatechine | 0.87 | 1.04E+05 | [M+H]+ | 290.848 | 290.8475 |
| Dibutyl phthalate | 9.55 | 1.04E+05 | [M+H]+ | 279.16 | 279.1598 |
| 5-HYDROXYLYSINE | 8.09 | 1.03E+05 | [M+H]+ | 163.133 | 163.1329 |
| Octadecanamide | 4.11 | 1.03E+05 | [M+H]+ | 284.149 | 284.1492 |
| 3,4,5-Trimethoxybenzoic Acid | 9.73 | 1.01E+05 | [M+H]+ | 213.149 | 213.149 |
| URIDINE | 2.11 | 9.86E+04 | [M+H]+ | 245.077 | 245.0771 |
| N-ACETYLGLUTAMATE | 1.99 | 9.75E+04 | [M+H]+ | 190.071 | 190.071 |
| Emodin | 8.76 | 9.61E+04 | [M+H]+ | 271.061 | 271.061 |
| PHOSPHORIBOSYL PYROPHOSPHATE | 17.62 | 9.41E+04 | [M]+ | 391.284 | 391.2843 |
| Maackiain | 8.63 | 9.33E+04 | [M+H]+ | 285.076 | 285.0763 |
| GUANINE | 5.14 | 9.24E+04 | [M+H]+ | 152.057 | 152.0566 |
| N-ACETYLGLUTAMATE | 3.08 | 9.17E+04 | [M+H]+ | 190.071 | 190.071 |
| Chlorogenic acid | 6.49 | 8.98E+04 | [M+H]+ | 355.16 | 355.16 |
| Donepezil | 0.91 | 8.86E+04 | [M+K]+ | 380.096 | 380.0954 |
| Emodin | 12.12 | 8.77E+04 | [M+H]+ | 271.061 | 271.0607 |
| Benzoylpaeoniflorin +NH3 | 9.88 | 8.70E+04 | [M+H]+ | 602.224 | 602.2237 |
| N-ACETYLPROLINE | 2.93 | 8.47E+04 | [M+H]+ | 158.092 | 158.0923 |
| Cytisine | 2.19 | 8.40E+04 | [M+H]+ | 191.118 | 191.1176 |
| 5-HYDROXYLYSINE | 10.4 | 8.24E+04 | [M+H]+ | 163.133 | 163.1331 |
| Physcion | 9.38 | 8.14E+04 | [M+H]+ | 285.076 | 285.0762 |
| Diosgenin Glucoside | 7.75 | 7.93E+04 | [M+H]+ | 577.157 | 577.155 |
| calycosin-7-o-glucoside | 8.63 | 7.89E+04 | [M+NH4]+ | 464.155 | 464.1555 |
| ADENOSINE | 5.14 | 7.86E+04 | [M+H]+ | 268.104 | 268.1047 |
| Isoliquiritigenin | 5.65 | 7.79E+04 | [M+NH4]+ | 274.092 | 274.0927 |
| Albiflorin | 7.91 | 7.73E+04 | [2M+H]+ | 961.334 | 961.333 |
| 5,6-Dihydro-5-Methyluracil | 2.38 | 7.71E+04 | [M+H]+ | 129.018 | 129.018 |
| L-Tryptophan | 5.95 | 7.66E+04 | [M+NH4]+ | 205.097 | 205.0972 |
| Narcissoside | 7.47 | 7.64E+04 | [M+H]+ | 625.176 | 625.1759 |
| PYROGLUTAMATE | 1.56 | 7.52E+04 | [2M+H]+ | 259.093 | 259.093 |
| PYROGLUTAMATE | 2.64 | 7.50E+04 | [2M+H]+ | 259.093 | 259.0931 |
| TYROSINE | 3.47 | 7.42E+04 | [M+NH4]+ | 182.081 | 182.0812 |
| BENZOATE | 18.55 | 7.42E+04 | [M+H]+ | 123.079 | 123.0791 |
| Canavanine | 1.26 | 7.39E+04 | [M+H]+ | 177.087 | 177.087 |
| Dibutyl phthalate | 14.03 | 7.34E+04 | [M+H]+ | 279.16 | 279.1595 |
| Phenylalanine | 5.38 | 7.33E+04 | [M+H]+ | 166.087 | 166.0864 |
| 5-HYDROXYLYSINE | 5.73 | 7.29E+04 | [M+H]+ | 163.133 | 163.133 |
| N-Acetyl-L-tryptophan | 6.34 | 7.22E+04 | [2M+H]+ | 493.282 | 493.2813 |
| 5-HYDROXYLYSINE | 5.9 | 7.09E+04 | [M+H]+ | 163.039 | 163.0389 |
| Homogentisic acid | 3.88 | 6.87E+04 | [M+H]+ | 169.013 | 169.0131 |
| Moxisylyte | 10.78 | 6.83E+04 | [M+H]+ | 280.264 | 280.2642 |
| PIPECOLATE | 1.44 | 6.79E+04 | [M+H]+ | 130.087 | 130.0871 |
| Ibuprofen | 8.4 | 6.78E+04 | [M+H]+ | 207.102 | 207.1022 |
| Indoleacrylic acid | 5.95 | 6.77E+04 | [M+H]+ | 188.071 | 188.0711 |
| Glycyrrhetinic acid | 14.13 | 6.59E+04 | [M+H]+ | 471.347 | 471.3471 |
| Methyl dihydrojasmonate | 10.68 | 6.55E+04 | [M+H]+ | 227.164 | 227.1644 |
| 3-Hydroxy-9,10-Dimethoxypterocarpan | 8.52 | 6.54E+04 | [M+H]+ | 301.108 | 301.1076 |
| 2-nonanol | 5.17 | 6.53E+04 | [M+H]+ | 145.05 | 145.0494 |
| guanosine | 5.1 | 6.47E+04 | [M+H]+ | 284.1 | 284.0994 |
| 4-COUMARATE | 2.18 | 6.40E+04 | [M+H]+ | 165.054 | 165.0546 |
| Saikosaponin B2 | 10.43 | 6.22E+04 | [M+H]+ | 781.474 | 781.4741 |
| Hyperin | 7.37 | 5.95E+04 | [M+H]+ | 465.102 | 465.1016 |
| Androstanedione | 2.83 | 5.91E+04 | [M+H]+ | 289.139 | 289.1392 |
| Quinapril | 11.85 | 5.90E+04 | [M+H]+ | 439.175 | 439.1756 |
| Albiflorin | 6.86 | 5.79E+04 | [2M+NH4]+ | 978.364 | 978.3617 |
| (S)-2-Hydroxybutanoicacid | 0.76 | 5.77E+04 | [M+H]+ | 105.003 | 105.0029 |
| Isoliquiritigenin | 8.75 | 5.69E+04 | [M+H]+ | 257.081 | 257.0814 |
| 3-METHOXYTYROSINE | 5.17 | 5.60E+04 | [M+H]+ | 212.103 | 212.1029 |
| N-ACETYLPROLINE | 1.51 | 5.60E+04 | [M+H]+ | 158.092 | 158.0923 |
| 1,4-Xylene | 11.83 | 5.59E+04 | [M+H]+ | 107.07 | 107.07 |
| ASPARAGINE | 0.94 | 5.57E+04 | [M+H]+ | 133.06 | 133.0605 |
| Octadecanamide | 17 | 5.53E+04 | [M+H]+ | 284.295 | 284.295 |
| Oxymatrine | 5.94 | 5.52E+04 | [M+H]+ | 265.192 | 265.1919 |
| Chrysosplenetin B | 10.99 | 5.47E+04 | [M]+ | 375.108 | 375.1078 |
| ADENINE | 1.44 | 5.43E+04 | [M+H]+ | 136.062 | 136.0617 |
| Cypermethrin | 6.36 | 5.34E+04 | [M+H]+ | 433.134 | 433.1344 |
| 2-PROPENOATE | 19.63 | 5.27E+04 | [M+H]+ | 72.937 | 72.9368 |
| Ginkgolide B +NH3 | 6.53 | 5.25E+04 | [M+H]+ | 442.27 | 442.2699 |
| Isoliquiritigenin | 5.65 | 5.25E+04 | [M+H]+ | 257.066 | 257.066 |
| AMINOISOBUTANOATE | 0.98 | 5.24E+04 | [M+H]+ | 104.107 | 104.1067 |
| ALLYL ISOTHIOCYANATE | 12.5 | 5.13E+04 | [M+H]+ | 100.075 | 100.0755 |
| 2,4-Dihydroxypyrimidine-5-carboxylic acid | 1.8 | 5.11E+04 | [M+H]+ | 157.013 | 157.013 |
| Spinosyn D | 14.46 | 5.00E+04 | [M+H]+ | 746.527 | 746.526 |
| 1-DECANOL | 20.62 | 4.96E+04 | [M+H]+ | 158.962 | 158.9614 |
| Tioconazole | 11.06 | 4.96E+04 | [2M+NH4]+ | 790.381 | 790.3815 |
| Eremofortin B | 11.52 | 4.93E+04 | [M+H]+ | 249.149 | 249.1487 |
| Isoliquiritigenin | 7.33 | 4.90E+04 | [M+H]+ | 257.081 | 257.0812 |
| Albiflorin | 7.37 | 4.90E+04 | [M+H]+ | 481.17 | 481.1701 |
| Esculin | 6.23 | 4.87E+04 | [M+H]+ | 341.087 | 341.0873 |
| Esculetin | 1.8 | 4.79E+04 | [M+H]+ | 179.07 | 179.0701 |
| Coniine | 0.76 | 4.77E+04 | [M+H]+ | 128.019 | 128.0188 |
| 5-HYDROXYLYSINE | 0.85 | 4.75E+04 | [M+K]+ | 201.089 | 201.0891 |
| Patchouli alcohol (loss H20) | 14.03 | 4.74E+04 | [M+H]+ | 205.086 | 205.0862 |
| Diosmetin | 9.65 | 4.69E+04 | [M+H]+ | 301.071 | 301.0716 |
| SACCHARATE | 5.65 | 4.65E+04 | [M+H]+ | 211.06 | 211.0604 |
| TRIGONELLINE | 1.2 | 4.59E+04 | [M+H]+ | 138.055 | 138.0548 |
| 1,2-Dichloroethane | 17.23 | 4.55E+04 | [M+H]+ | 100.075 | 100.0754 |
| 5-HYDROXYLYSINE | 12.74 | 4.53E+04 | [M+H]+ | 163.133 | 163.1332 |
| Fenpyroximate | 13.54 | 4.51E+04 | [M+H]+ | 422.168 | 422.1675 |
| Dehydrocostus lactone | 11.52 | 4.40E+04 | [M+H]+ | 231.138 | 231.1382 |
| URACIL | 3.82 | 4.39E+04 | [M+H]+ | 113.034 | 113.0341 |
| 5-HYDROXYLYSINE | 9.08 | 4.34E+04 | [M+H]+ | 163.133 | 163.1329 |
| Tanshinone I | 13.37 | 4.32E+04 | [M+H]+ | 277.086 | 277.0862 |
| 6-PHOSPHOGLUCONATE | 9.72 | 4.28E+04 | [M+H]+ | 277.217 | 277.2168 |
| ALLYL ISOTHIOCYANATE | 13.34 | 4.27E+04 | [M+H]+ | 100.076 | 100.0756 |
| Norgesterel | 9.72 | 4.18E+04 | [M+H]+ | 313.238 | 313.2376 |
| BETAINE | 1.06 | 4.12E+04 | [M+H]+ | 118.086 | 118.086 |
| Betulonicacid | 9.82 | 4.03E+04 | [M+H]+ | 455.352 | 455.352 |
| Norgesterel | 11.37 | 4.00E+04 | [M+H]+ | 313.237 | 313.2371 |
| Ribavirin | 5.27 | 3.92E+04 | [2M+H]+ | 489.323 | 489.323 |
| Demeton-S-methyl-sulfone | 5.12 | 3.89E+04 | [M+H]+ | 263.176 | 263.1759 |
| Coniine | 19.54 | 3.80E+04 | [M+H]+ | 128.143 | 128.1433 |
| TRIMETHYLAMINE | 13.34 | 3.77E+04 | [M+H]+ | 60.044 | 60.0442 |
| 5-HYDROXYLYSINE | 18.42 | 3.74E+04 | [M+H]+ | 163.133 | 163.1333 |
| Diphacinone | 11.76 | 3.72E+04 | [M+H]+ | 341.139 | 341.1388 |
| INOSINE | 4.15 | 3.72E+04 | [M+H]+ | 269.108 | 269.1076 |
| QUINOLINE | 6.33 | 3.61E+04 | [M+H]+ | 130.159 | 130.1587 |
| TRIMETHYLAMINE | 12.14 | 3.60E+04 | [M+H]+ | 60.044 | 60.0444 |
| Esculin | 6.03 | 3.54E+04 | [M+H]+ | 341.255 | 341.2551 |
| Ligustilide | 10.39 | 3.50E+04 | [M+H]+ | 191.107 | 191.107 |
| METHYL GALACTOSIDE | 9.73 | 3.42E+04 | [M+H]+ | 195.138 | 195.1382 |
| Vitamin B2 | 6.61 | 3.42E+04 | [M+Na]+ | 377.146 | 377.1458 |
| Isoliquiritigenin | 10.01 | 3.42E+04 | [M+H]+ | 257.081 | 257.081 |
| Acacetin | 11 | 3.42E+04 | [M+H]+ | 285.076 | 285.076 |
| Astragaloside Ⅳ | 9.82 | 3.39E+04 | [M+H]+ | 785.469 | 785.4684 |
| 5-HYDROXYLYSINE | 17.02 | 3.38E+04 | [M+H]+ | 163.133 | 163.1328 |
| N-ACETYLCYSTEINE | 11.85 | 3.36E+04 | [M+H]+ | 164.136 | 164.1363 |
| 4,5-DCQA Isochlorogenic acid C | 5.65 | 3.32E+04 | [M+H]+ | 517.155 | 517.1551 |
| URIDINE | 3.82 | 3.31E+04 | [M+H]+ | 245.077 | 245.0771 |
| Protocatechuic Aldehyde | 6.41 | 3.26E+04 | [M+H]+ | 139.039 | 139.0389 |
| 4'-O-β-Glucopyranosyl-5-O-methylvisamminol | 7.56 | 3.24E+04 | [M+H]+ | 453.176 | 453.1759 |
| Salvianolic acid B | 8.37 | 9.52E+06 | [M-H]- | 717.151 | 717.1507 |
| Paeoniflorin +HCOOH | 7.09 | 5.91E+06 | [M-H]- | 525.164 | 525.1636 |
| Salvianolic acid A | 8.57 | 5.77E+06 | [M-H]- | 493.117 | 493.1164 |
| Glycyrrhizic acid ammonium salt | 10.25 | 3.49E+06 | [M-H]- | 821.4 | 821.4007 |
| 2,3,5,4'-Tetrahydroxystilbene-2-O-b-D-glucoside | 7.44 | 2.93E+06 | [M-H]- | 405.122 | 405.1208 |
| D-(+)-Mannose | 1.11 | 2.30E+06 | [M+Cl]- | 215.035 | 215.0344 |
| Linoleic acid | 15.72 | 2.22E+06 | [M-H]- | 279.236 | 279.2347 |
| Citric acid | 1.51 | 2.08E+06 | [M-H]- | 191.022 | 191.0213 |
| Albiflorin | 8 | 1.68E+06 | [M+FA-H]- | 525.165 | 525.1638 |
| TREHALOSE | 1.39 | 1.64E+06 | [M+FA-H]- | 387.116 | 387.1153 |
| 3,4-DCQA Isochlorogenic acid B | 7.59 | 1.60E+06 | [M-H]- | 515.123 | 515.1227 |
| Mulberroside A | 6.15 | 1.60E+06 | [M-H]- | 567.174 | 567.1732 |
| PFNS (perfluorononane sulfonate) (neg) | 7.3 | 1.53E+06 | [M-H]- | 549.163 | 549.1627 |
| 1,4-Dicaffeoylquinic Acid (Cynarin) | 6.83 | 1.53E+06 | [M-H]- | 515.122 | 515.1211 |
| ROSMARINATE | 8.03 | 1.47E+06 | [M-H]- | 359.08 | 359.0796 |
| Plantamajoside | 7.36 | 1.38E+06 | [M-H]- | 639.196 | 639.1959 |
| TREHALOSE | 1.39 | 1.19E+06 | [M-H]- | 341.11 | 341.1101 |
| Dipsacoside B | 7.44 | 1.16E+06 | [2M-H]- | 811.251 | 811.2505 |
| Salvianolic acid A | 8.57 | 1.14E+06 | [2M-H]- | 987.241 | 987.2406 |
| Danshensu | 5.63 | 1.09E+06 | [M-H]- | 197.048 | 197.0469 |
| Gallic acid | 5.08 | 1.07E+06 | [M-H]- | 169.016 | 169.0154 |
| Emodin-8-glucoside | 8.86 | 1.04E+06 | [M-H]- | 431.101 | 431.1002 |
| cis-Aconitic acid | 1.93 | 1.04E+06 | [M-H]- | 173.011 | 173.0106 |
| Rutin | 7.21 | 9.28E+05 | [M-H]- | 609.149 | 609.1483 |
| Trifolirhizin +HCOOH | 8.73 | 8.73E+05 | [M-H]- | 491.122 | 491.1215 |
| Mulberroside A +HCOOH | 6.15 | 8.36E+05 | [M+FA-H]- | 613.179 | 613.1789 |
| Emodin | 12.22 | 7.06E+05 | [M-H]- | 269.049 | 269.048 |
| Neochlorogenic acid | 5.98 | 6.99E+05 | [M-H]- | 353.09 | 353.0892 |
| PHOSPHOENOLPYRUVATE | 6.89 | 5.89E+05 | [M+FA-H]- | 167.036 | 167.036 |
| Salvianolic acid B | 8.64 | 5.41E+05 | [M]- | 718.154 | 718.1543 |
| Sulfamethazine | 15.09 | 5.27E+05 | [M-H]- | 277.22 | 277.2187 |
| PALMITATE | 5.71 | 5.21E+05 | [2M-H]- | 511.112 | 511.1102 |
| MALATE | 1.47 | 5.14E+05 | [M-H]- | 133.016 | 133.0156 |
| Protocatechuic aldehyde | 6.52 | 4.85E+05 | [M-H]- | 137.026 | 137.025 |
| OXOPROLINE | 2.81 | 4.70E+05 | [M-H]- | 128.037 | 128.0362 |
| Apigenin-7-glucoside | 7.82 | 4.66E+05 | [M-H]- | 431.101 | 431.0998 |
| Azelaic acid | 8.15 | 4.63E+05 | [M-H]- | 187.1 | 187.099 |
| D-Tagatose | 1.12 | 4.42E+05 | [M-H]- | 179.059 | 179.0574 |
| Melibiose | 1.18 | 4.20E+05 | [M+Cl]- | 377.087 | 377.0868 |
| Quinic acid | 1.27 | 4.19E+05 | [M-H]- | 191.057 | 191.0576 |
| Albiflorin | 8 | 4.18E+05 | [M-H]- | 479.158 | 479.158 |
| 3-(4-Hydroxyphenyl)-Propionic Acid | 6.45 | 4.18E+05 | [M-H]- | 165.057 | 165.0565 |
| PALMITATE | 16.3 | 4.04E+05 | [M-H]- | 255.235 | 255.2345 |
| Liquiritin | 7.42 | 3.69E+05 | [M-H]- | 417.12 | 417.1201 |
| Apigenin | 9.58 | 3.56E+05 | [M-H]- | 269.048 | 269.0475 |
| Calycosin | 9.01 | 3.41E+05 | [M-H]- | 283.064 | 283.0628 |
| 1,11-Undecanedicarboxylic acid | 10.78 | 3.25E+05 | [M-H]- | 243.162 | 243.1617 |
| Terephthalic Acid | 6.79 | 3.25E+05 | [M-H]- | 165.021 | 165.0205 |
| Lobetyolin +HCOOH | 8.07 | 3.24E+05 | [M-H]- | 441.179 | 441.179 |
| cinnamic acid | 19.79 | 3.03E+05 | [M-H]- | 146.94 | 146.9395 |
| Momordin Ic | 3.31 | 2.90E+05 | [M-H]- | 763.186 | 763.1858 |
| Saikosaponin A +HCOOH | 10.52 | 2.89E+05 | [M-H]- | 825.465 | 825.4693 |
| MESOXALATE | 16.07 | 2.86E+05 | [M]- | 116.93 | 116.9292 |
| Salvianolic acid A | 5.3 | 2.82E+05 | [M-H]- | 493.121 | 493.121 |
| Vaccenic acid | 16.46 | 2.72E+05 | [M-H]- | 281.251 | 281.2501 |
| PFPrS (perfluoropropane sulfonate) (neg) | 16.02 | 2.65E+05 | [M-H]- | 248.975 | 248.9746 |
| Luteolin | 8.94 | 2.60E+05 | [M-H]- | 285.043 | 285.0428 |
| Isoliquiritigenin | 8.87 | 2.50E+05 | [M-H]- | 255.068 | 255.0677 |
| Astragaloside Ⅱ +HCOOH | 10.45 | 2.38E+05 | [M+FA-H]- | 871.477 | 871.4768 |
| Ononin +HCOOH | 8.34 | 2.29E+05 | [M-H]- | 475.126 | 475.1263 |
| OXOPROLINE | 1.56 | 2.25E+05 | [M-H]- | 128.036 | 128.0358 |
| Maltopentaose | 4.91 | 2.25E+05 | [M-H]- | 827.272 | 827.2722 |
| Astragaloside I +HCOOH | 11.75 | 1.99E+05 | [M+FA-H]- | 913.486 | 913.4858 |
| N-ACETYLGLUTAMATE | 1.7 | 1.96E+05 | [M+AcO-H]- | 188.058 | 188.0578 |
| Isoliquiritin | 8.25 | 1.94E+05 | [M-H]- | 417.121 | 417.121 |
| Chlorogenic acid | 6.45 | 1.91E+05 | [2M-H]- | 707.186 | 707.1857 |
| Flavin Mononucleotide | 5.51 | 1.85E+05 | [M-H]- | 455.089 | 455.0887 |
| 2-Isopropylmalic acid | 6.48 | 1.85E+05 | [M-H]- | 175.062 | 175.062 |
| D-Glucose | 1.01 | 1.84E+05 | [M+FA-H]- | 225.063 | 225.0628 |
| Ethyl hexadecanoate1 | 17.45 | 1.81E+05 | [M-H]- | 283.266 | 283.2659 |
| Tolazoline | 0.83 | 1.62E+05 | [M-H]- | 158.979 | 158.9793 |
| Maltopentaose | 4.91 | 1.52E+05 | [M+FA-H]- | 873.278 | 873.2771 |
| Uridine | 1.64 | 1.49E+05 | [M-H]- | 243.064 | 243.0636 |
| Thiabendazole | 4.79 | 1.42E+05 | [M-H]- | 200.059 | 200.058 |
| Citric acid | 5.34 | 1.42E+05 | [M-H]- | 191.058 | 191.0573 |
| PFHxA (perfluoro-n-hexanoic acid) (neg) | 9.37 | 1.37E+05 | [M-H]- | 313.038 | 313.0374 |
| PolyphyllinⅠ | 9.04 | 1.36E+05 | [M-H]- | 853.389 | 853.3903 |
| D-Xylonic Acid Lithium Salt | 1.11 | 1.34E+05 | [M-H]- | 165.041 | 165.0414 |
| MESOXALATE | 13.42 | 1.31E+05 | [M]- | 116.93 | 116.9292 |
| Astragaloside Ⅳ +HCOOH | 9.9 | 1.30E+05 | [M-H]- | 829.465 | 829.4644 |
| Astragaloside Ⅱ +HCOOH | 11.04 | 1.26E+05 | [M-H]- | 871.475 | 871.4754 |
| Aspartic acid | 1.02 | 1.23E+05 | [M-H]- | 132.031 | 132.0311 |
| L-3-Phenyllactic acid | 7.64 | 1.22E+05 | [M-H]- | 165.057 | 165.0568 |
| Stachyose | 3.32 | 1.22E+05 | [M+FA-H]- | 711.224 | 711.2234 |
| Geniposide | 6.67 | 1.19E+05 | [M-H]- | 387.168 | 387.1675 |
| Maltotriose | 1.35 | 1.18E+05 | [M-H]- | 503.163 | 503.1631 |
| Isoferulic acid | 7.74 | 1.16E+05 | [M-H]- | 193.052 | 193.0518 |
| N-ACETYLGLUTAMATE | 3.28 | 1.07E+05 | [M-H]- | 188.058 | 188.0577 |
| 3-(4-HYDROXYPHENYL)PYRUVATE | 19.79 | 1.04E+05 | [M-H]- | 178.98 | 178.979 |
| 4-O-Caffeoyl quinic acid | 6.6 | 1.04E+05 | [M-H]- | 353.147 | 353.1464 |
| Phenprobamate | 5.38 | 1.03E+05 | [M-H]- | 164.073 | 164.0727 |
| Undecanedioic acid | 9.53 | 1.03E+05 | [M-H]- | 215.131 | 215.1304 |
| Daidzin | 8.98 | 9.93E+04 | [M-H]- | 415.107 | 415.1058 |
| 3,4-DIHYDROXYBENZOATE | 5.89 | 9.88E+04 | [M-H]- | 153.021 | 153.0202 |
| ASPARAGINE | 1 | 9.78E+04 | [M-H]- | 131.047 | 131.047 |
| 4-COUMARATE | 7.5 | 9.69E+04 | [M-H]- | 163.041 | 163.041 |
| Ethyl ferulate | 9.67 | 9.63E+04 | [M-H]- | 221.084 | 221.0835 |
| Butylparaben | 9.66 | 9.57E+04 | [M-H]- | 193.088 | 193.0883 |
| Isoliquiritigenin | 10.1 | 9.54E+04 | [M-H]- | 255.068 | 255.068 |
| Fulvic acid | 9.15 | 9.33E+04 | [M-H]- | 307.075 | 307.0745 |
| METHYLMALONATE | 2.19 | 8.92E+04 | [M-H]- | 117.021 | 117.02 |
| 2-Methyl-5-nitroimidazole-1-ethanol | 5.08 | 8.87E+04 | [M-H]- | 170.02 | 170.0189 |
| Sibiricose A5 | 1.35 | 8.76E+04 | [M-H]- | 517.192 | 517.1911 |
| Trifolirhizin +HCOOH | 9.48 | 8.74E+04 | [M+FA-H]- | 491.123 | 491.1221 |
| Vincristine | 11.12 | 8.70E+04 | [M-H]- | 823.414 | 823.4144 |
| Acteoside; Verbascoside; Kusaginin | 7.5 | 8.61E+04 | [M-H]- | 623.2 | 623.2 |
| 4-HYDROXYBENZOATE | 8.63 | 8.40E+04 | [M-H]- | 137.026 | 137.0257 |
| Mulberroside A +HCOOH | 6.8 | 8.35E+04 | [M]- | 613.18 | 613.1793 |
| 4-Bromophenylalanine | 9.74 | 8.16E+04 | [M-H]- | 242.179 | 242.178 |
| Ibuprofen | 10.41 | 8.08E+04 | [M-H]- | 205.089 | 205.0887 |
| 11-Hydroxy-THC Negative | 10.41 | 8.07E+04 | [M-H]- | 329.235 | 329.235 |
| Prostaglandin F2A | 11.16 | 7.84E+04 | [M-H]- | 353.104 | 353.1043 |
| Uridine | 4.05 | 7.72E+04 | [M-H]- | 243.063 | 243.0635 |
| Glycitin | 9.48 | 7.66E+04 | [M-H]- | 445.117 | 445.1163 |
| Aucubin +HCOOH | 6.35 | 7.45E+04 | [M-H]- | 391.163 | 391.1622 |
| Acacetin | 11.12 | 7.09E+04 | [M-H]- | 283.064 | 283.0629 |
| L-Tryptophan | 6.04 | 6.96E+04 | [M-H]- | 203.084 | 203.0838 |
| Oligomycin B | 11.28 | 6.49E+04 | [M-H2O-H]- | 805.404 | 805.4051 |
| Rhein | 10.95 | 6.41E+04 | [M-H]- | 283.027 | 283.0261 |
| L(+)-Arginine | 0.98 | 6.39E+04 | [M-H]- | 173.106 | 173.1055 |
| Quinic acid | 6.44 | 6.35E+04 | [M-H]- | 191.058 | 191.0571 |
| Heptanoic acid | 0.95 | 6.11E+04 | [M-H]- | 128.961 | 128.9603 |
| Hydroxygenkwanin | 9.76 | 6.09E+04 | [M-H]- | 299.059 | 299.0582 |
| Saikosaponin C +HCOOH | 9.65 | 6.04E+04 | [M-H]- | 971.525 | 971.5267 |
| Uridine | 1.65 | 6.03E+04 | [M+FA-H]- | 289.069 | 289.0691 |
| Dodecanedioic acid | 10.17 | 6.03E+04 | [M-H]- | 229.147 | 229.1459 |
| Luteoloside | 5.86 | 5.88E+04 | [M+FA-H]- | 447.116 | 447.116 |
| 3,5-DCQA Isochlorogenic acid A | 5.48 | 5.37E+04 | [M-H]- | 515.143 | 515.1419 |
| Fungitetraose | 3.31 | 5.16E+04 | [M-H]- | 665.218 | 665.2175 |
| Asperosaponin Ⅵ +HCOOH | 9.75 | 5.14E+04 | [M-H]- | 973.539 | 973.5424 |
| 4-HYDROXYBENZALDEHYDE | 7.27 | 4.95E+04 | [M-H]- | 121.031 | 121.0297 |
| MESOXALATE | 11.64 | 4.89E+04 | [M-H]- | 116.93 | 116.9291 |
| TRANS-CINNAMATE | 2.32 | 4.82E+04 | [M-H]- | 147.031 | 147.0309 |
| Naringenin | 9.55 | 4.81E+04 | [M-H]- | 271.063 | 271.0625 |
| Indoleacrylic acid | 2.85 | 4.62E+04 | [M-H]- | 186.042 | 186.0421 |
| 1,11-Undecanedicarboxylic acid | 8.51 | 4.59E+04 | [M-H]- | 243.126 | 243.1252 |
| FURFURYL ALCOHOL | 5.87 | 4.45E+04 | [M-H]- | 96.961 | 96.9604 |
| Nonadecanoic acid | 13.68 | 3.67E+04 | [M-H]- | 297.246 | 297.2453 |
| Paspalic acid | 9.7 | 3.66E+04 | [M-H]- | 267.163 | 267.1618 |
| Quercetin | 8.98 | 3.54E+04 | [M-H]- | 301.037 | 301.0373 |
| Biocytin | 9.14 | 3.51E+04 | [M-H]- | 371.116 | 371.1158 |
| ROSMARINATE | 5.57 | 3.51E+04 | [M-H]- | 359.101 | 359.1 |
| Saikosaponin D | 10.52 | 3.43E+04 | [M-H]- | 779.46 | 779.4624 |
| Porphobilinogen | 6.16 | 3.36E+04 | [M+AcO-H]- | 285.063 | 285.0625 |
| Isorhamnetin | 12.69 | 3.36E+04 | [M-H]- | 315.255 | 315.2556 |
| Citric acid | 5.18 | 3.35E+04 | [M-H]- | 191.022 | 191.021 |
| Tenuifoliside A | 15.61 | 3.27E+04 | [M-H]- | 681.298 | 681.2991 |
| Ethyl ferulate | 9.16 | 3.19E+04 | [M-H]- | 221.084 | 221.0836 |
| GLYCERALDEHYDE | 5.39 | 3.18E+04 | [M-H]- | 89.026 | 89.0247 |
| Catalpol | 5.86 | 3.03E+04 | [M-H]- | 407.158 | 407.1576 |
| Maltopentaose | 2.15 | 2.97E+04 | [M-H]- | 827.271 | 827.2707 |
| N-Acetyl-L-phenylalanine | 7.41 | 2.92E+04 | [M-H]- | 206.083 | 206.0833 |
| Citrinin | 11.15 | 2.92E+04 | [M-H]- | 251.166 | 251.1666 |
| Porphobilinogen | 5.87 | 2.87E+04 | [M-H]- | 225.042 | 225.0424 |
| ARACHIDATE | 12.77 | 2.82E+04 | [M-H]- | 311.225 | 311.2244 |
| 2,5-DIHYDROXYBENZOATE | 6.66 | 2.76E+04 | [M-H]- | 153.021 | 153.02 |
| CP 47,497 C8-homolog Negative Mode | 9.71 | 2.73E+04 | [M-H]- | 331.252 | 331.2507 |
| INDOLE | 12.36 | 2.71E+04 | [M-H]- | 115.922 | 115.9213 |
| 4-Aminosalicylic acid | 6.65 | 2.65E+04 | [M-H]- | 152.037 | 152.036 |
| Atractylenolide Ⅲ | 11.62 | 2.61E+04 | [M-H]- | 247.136 | 247.1357 |
| 3-Methylthiophene | 6.59 | 2.58E+04 | [M-H]- | 96.961 | 96.9604 |
| 3-Methylthiophene | 19.54 | 2.42E+04 | [M-H]- | 96.961 | 96.9604 |
| Aempferol-3-O-rutinoside | 7.5 | 2.36E+04 | [M-H]- | 593.153 | 593.1528 |
| Epimeredinoside A | 8.5 | 2.34E+04 | [M-H]- | 651.231 | 651.2321 |
| 6:2 PAP (6:2 fluorotelomer phosphate ester) (neg) | 6.2 | 2.31E+04 | [M-H]- | 443.194 | 443.1934 |
| Vitamin C | 5.96 | 2.28E+04 | [M-H]- | 175.063 | 175.0618 |
| Calceorioside B | 5.46 | 2.27E+04 | [M+FA-H]- | 477.126 | 477.1257 |
| Maltopentaose | 2.15 | 2.27E+04 | [M+FA-H]- | 873.278 | 873.2772 |
| 3,5-Dinitrosalicylate | 6.09 | 2.08E+04 | [M-H]- | 227.106 | 227.1049 |
| Pachymic acid | 6.07 | 1.90E+04 | [M-H]- | 527.142 | 527.1421 |
| Ginsenoside-Ro | 12.9 | 1.85E+04 | [M-H]- | 955.497 | 955.4958 |
| MESOXALATE | 10.13 | 1.79E+04 | [M-H]- | 116.93 | 116.9291 |
| Liquiritigenin | 10.1 | 1.64E+04 | [M]- | 256.072 | 256.0715 |
| Glycyrrhizic acid ammonium salt | 9.05 | 1.57E+04 | [M-H]- | 821.399 | 821.3995 |
| Oleanolic acid | 15.4 | 1.55E+04 | [M-H]- | 455.355 | 455.3551 |
| Apigenin | 9.51 | 1.54E+04 | [M-H]- | 269.083 | 269.0834 |
| Lipoxin A4 | 12.51 | 1.52E+04 | [M-H]- | 351.088 | 351.0882 |
| GLYCEROL | 19.58 | 1.50E+04 | [M-H]- | 90.935 | 90.9342 |
| Glycyrrhetinic acid | 14.19 | 1.41E+04 | [M-H]- | 469.333 | 469.3331 |
| Scutellarin | 5.88 | 1.40E+04 | [M-H]- | 461.167 | 461.1672 |
| 5-Thymidylic acid | 11.43 | 1.26E+04 | [M-H]- | 321.114 | 321.1145 |
| GLYCERALDEHYDE | 1.83 | 1.16E+04 | [M-H]- | 89.025 | 89.025 |
| Glabridin | 12.2 | 1.16E+04 | [M-H]- | 323.13 | 323.1305 |
| Oxoadipic acid | 2.92 | 1.09E+04 | [M-H]- | 159.031 | 159.031 |
| Andrastin A | 12.48 | 1.07E+04 | [M-H]- | 485.328 | 485.3282 |
| ERUCATE | 11.91 | 1.02E+04 | [M-H]- | 337.109 | 337.1096 |
| PFOS (perfluorooctane sulfonate) (neg) | 3.96 | 9.03E+03 | [M-H]- | 499.167 | 499.1695 |
| MESOXALATE | 11.04 | 7.24E+03 | [M]- | 116.93 | 116.9291 |
| INDOLE | 11.11 | 6.80E+03 | [M-H]- | 115.922 | 115.9211 |
| 5(S),12(S)-DiHETE | 12.24 | 5.71E+03 | [M-H]- | 335.094 | 335.094 |
| 8-epiloganic acid | 5.84 | 4.23E+03 | [M-H2O-H]- | 375.131 | 375.1304 |
| Catechin | 6.48 | 3.88E+03 | [M-H]- | 289.074 | 289.0717 |
| Asiatic acid | 11.46 | 3.85E+03 | [M-H]- | 487.343 | 487.343 |
| Glycyrrhetinic acid | 14.29 | 3.35E+03 | [M-H]- | 469.334 | 469.3343 |
| Phytolaccagenin +HCOOH | 6.28 | 2.39E+03 | [M+FA-H]- | 577.137 | 577.129 |
| Hederagenin | 13.49 | 1.90E+03 | [M-H]- | 471.349 | 471.3491 |
